# Supplementary material for: Investigations on the Global Spread of the Hunga Tonga-Hunga Ha’apai Volcanic Eruption Using Space-Based Observations and Lagrangian Transport Simulations
Source: MDPI journal article supplement (doi:10.3390/atmos13122055), 2022-12-08
Supplement: s1 [file s1]

---

## Supplementary Materials

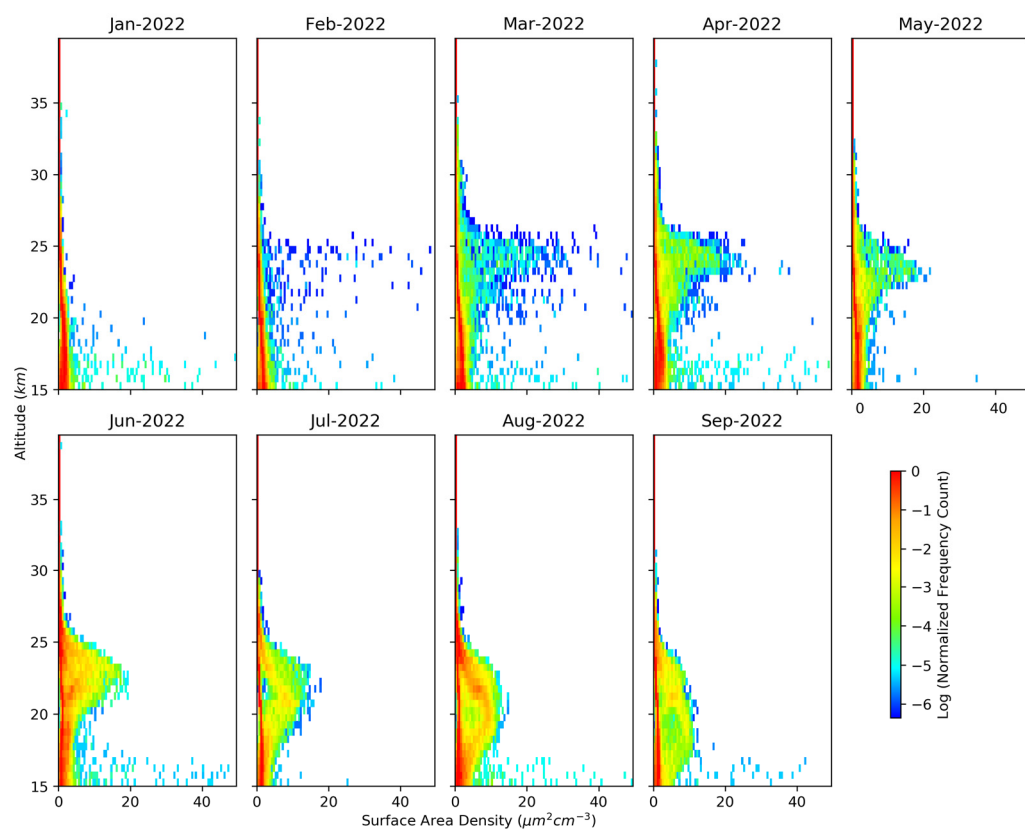

**Figure S1.** Histogram of surface area density computed using SAGE III/ISS data during different months after the HTHH eruption.

---
